# Supplementary material for: Assessment of the distribution of phenolic compounds and contribution to the antioxidant activity in Tunisian fig leaves, fruits, skins and pulps using mass spectrometry-based analysis
Source: Royal Society of Chemistry journal article supplement (doi:10.1039/c5fo00837a), 2015-01-01
Supplement: c5fo00837a1.xlsx [file c5fo00837a1.xlsx]

## Sheet: Negative
Table S1. Phenolic compounds characterized using the negative ionization mode in the studied parts from F. carica.
	RTa (min)	Ma	[M-H]-	Formula	Score	Error (ppm)	UV (nm)	Ia	Main fragments via MS/MS	Proposed compound	Plant family	Reference
Hydroxybenzoic acids and derivatives
1	10.71	360.106	359.1	C15H20O10	96.5	-3.8	280	N	197.0455; 179.0346; 153.0549; 135.0452; 85.0292	Syringic acid hexoside I	Asteraceae (Lactuca sativa)	1
2	10.76	316.079	315.073	C13H16O9	97.6	-5.08	N.D.	N	153.0194; 152.0114; 109.0293; 108.0293	Dihydroxybenzoic acid hexoside I	Asteraceae (Lactuca sativa)	1
3	10.76	314.064	313.057	C13H14O9	84.1	-1.7	280	N	197.0348; 167.0351; 153.0560; 135.0454; 133.0141; 123.0454; 115.0038	Syringic acid malate I
4	10.86	360.106	359.099	C15H20O10	95.1	-2.08	280	N	197.0455; 179.0344; 153.0557; 135.0452; 123.0450; 85.0290	Syringic acid hexoside II	Asteraceae (Lactuca sativa)	1
5	11.07	330.095	329.088	C14H18O9	95.3	-2.69	255; 291	N	167.0348; 152.0115; 123.0447; 108.0215	Vanillic acid glucoside	Asteraceae (Lactuca sativa)	1
6	11.08	476.153	475.146	C20H28O13	84.5	-0.14	N.D.	N	329.0879; 167.0356; 109.0294	Vanillic acid hexoside deoxyhexoside
7	11.13	314.064	313.057	C13H14O9	84.2	-1.73	280	N	179.0327; 135.0451; 133.0141; 115.0031	Syringic acid malate II
8	11.2	434.106	433.099	C17H22O13	96.7	-0.15	280	N	301.0521; 169.0139; 168.0069; 151.0036; 125.0241	Gallic acid di-pentoside I
9	11.23	316.079	315.072	C13H16O9	99.6	0.69	N.D.	N	153.0188; 109.0293	Dihydroxybenzoic acid hexoside II	Asteraceae (Lactuca sativa)	1
10	11.51	434.099	433.099	C17H22O13	96.4	-1	280	N	301.0564; 169.0137; 168.0062; 151.0035; 125.0243	Gallic acid di-pentoside II
11	11.59	448.122	447.115	C18H24O13	91.9	-2.13	308	N	315.0719; 271.0816; 152.0113; 109.0293; 108.0216	Dihydroxybenzoic acid hexoside pentoside I	Fagaceae (Lithocarpus polystachyu)	2
12	12.32	448.122	447.114	C18H24O13	97.4	0.2	260; 300	N	152.0114; 109.0291	Dihydroxybenzoic acid hexoside pentoside II	Fagaceae (Lithocarpus polystachyu)	2
13	12.5	154.027	153.02	C7H6O4	85.6	-2.16	260; 290	N	109.0293; 108.0217	Dihydroxybenzoic acid	Moraceae (Ficus carica)	3
14	12.52	316.079	315.072	C13H16O9	97.3	-0.04	N.D.	N	153.0194; 152.0194; 109.0291; 108.0219	Dihydroxybenzoic acid hexoside III	Asteraceae (Lactuca sativa)	1
15	12.62	286.069	285.062	C12H14O8	93.7	-2.03	263; 300	N	153.0196; 152.0117; 109.0297; 108.0218	Dihydroxybenzoic acid pentoside I	Solanaceae (Solanum esculentum)	4
16	12.74	448.122	447.114	C18H24O13	96.2	0.54	N.D.	N	153.0181; 152.0114; 109.0291; 108.0216	Dihydroxybenzoic acid hexoside pentoside III	Fagaceae (Lithocarpus polystachyu)	2
17	13.09	418.111	417.105	C17H22O12	95.1	-3.19	316	N	285.0613; 241.0715; 153.0165; 152.0115; 108.0218; 109.0294	Dihydroxybenzoic acid di-pentoside	Fabaceae (Cyclopia genistoides)	4
18	13.1	286.069	285.062	C12H14O8	97.4	-1.85	N.D.	N	153.0193; 152.0108; 109.0293; 108.0218	Dihydroxybenzoic acid pentoside II	Solanaceae (Solanum esculentum)	5
19	14.67	138.032	137.024	C7H6O3	96.5	2.64	N.D.	N	109.0294; 108.0216; 93.0336; 92.0268	Hydroxybenzoic acid I	Asteraceae (Lactuca sativa)	1
20	15.1	138.032	137.024	C7H6O3	86	2.71	N.D.	N	93.0343	Hydroxybenzoic acid II	Asteraceae (Lactuca sativa)	1
21	15.91	168.042	167.035	C8H8O4	96.9	0.85	261; 292	N	152.0121; 123.0431; 124.0163; 108.0218	Vanillic acidg	Several familiesb
Hydroxycinnamic acids and derivatives
22	11.2	516.148	515.141	C22H28O14	88.4	-0.93	262; 328	N	353.0881; 191.0560; 179.0346	Caffeoylquinic acid hexoside I	Asteraceae (Cynara scolymus)	6
23	11.75	516.148	515.141	C22H28O14	92.69	0.19	266; 324	N	341.0872; 323.0771; 191.0559; 179.0348; 173.0451; 135.0451	Caffeoylquinic acid hexoside II	Asteraceae (Cynara scolymus)	6
24	12.21	344.111	343.104	C15H20O9	96.29	-1.61	282	N	181.0507; 163.0397; 137.0607; 135.0443	Dihydrocaffeic acid hexose	Asteraceae (Lactuca sativa)	7–10
25	12.21	354.095	353.088	C16H18O9	87.27	-0.71	264; 326	N	191.0560; 179.0349; 135.0448	Caffeoylquinic acid I	Moraceae (Ficus carica)	1
26	12.68	516.148	515.141	C22H28O14	92.88	-0.95	280; 320	N	341.0863; 323.0777; 191.0564; 179.0358; 135.0447	Caffeoylquinic acid hexoside III	Asteraceae (Cynara scolymus)	6
27	13.3	356.111	355.103	C16H20O9	99.59	0.3	326	N	193.0506; 178.0272; 149.0608; 134.0371	Ferulic acid hexoside I	Solanaceae (Solanum esculentum)	4
28	13.69	338.1	337.093	C16H18O8	81.3	0.83	300; 320	N	191.0557; 173.0454; 163.0399	Coumaroylquinic acid I	Asteraceae (Lactuca sativa)	1
29	13.92	354.095	353.089	C16H18O9	93.63	-3.98	296; 328	N	191.0566; 179.0349	Caffeoylquinic acid IIg (chlorogenic acid)	Moraceae (Ficus carica)	7–10
30	14.05	326.1	325.093	C15H18O8	93.16	-0.1	N.D.	N	163.0400; 119.0502	Comaroyl hexoside	Solanaceae (Solanum esculentum)	4
31	14.17	354.095	353.089	C16H18O9	84.66	-0.99	328	N	191.0558; 179.0347; 135.0452	Caffeoylquinic acid III	Moraceae (Ficus carica)	7–10
32	14.73	356.111	355.104	C16H20O9	96.98	-1.49	328	N	193.0508; 178.0270; 149.0610; 134.0373	Ferulic acid hexoside II	Solanaceae (Solanum esculentum)	4
33	15.22	354.095	353.089	C16H18O9	95.61	-2.95	272; 328	N	191.056	Caffeoylquinic acid IV	Moraceae (Ficus carica)	7–10
34	15.69	338.1	337.093	C16H18O8	99.71	-0.63	272; 332	N	191.056	Coumaroylquinic acid II	Asteraceae (Lactuca sativa)	1
35	15.85	180.042	179.035	C9H8O4	97.04	1.01	295; 324	N	135.048; 134.0368; 89.0396	Caffeic acidg	Moraceae (Ficus carica)	11
36	15.96	296.053	295.046	C13H12O8	99.17	0.29	296; 328	N	179.0345; 133.0140; 115.0034	Caffeoylmalic acid	Moraceae (Ficus carica)	9
37	16.72	338.1	337.092	C16H18O8	95.94	2.16	272; 328	N	191.056	Coumaroylquinic acid III	Asteraceae (Lactuca sativa)	1
38	17.25	386.121	385.115	C17H22O10	98.67	-2.57	268; 328	N	267.0703; 249.0592; 223.0378; 205.0353; 147.0302; 113.0244; 91.0556; 85.0296	Sinapic acid hexoside	Solanaceae (Solanum esculentum)	4
39	18.02	280.058	279.051	C13H12O7	98.89	0.05	288; 326	N	163.0398; 133.0139; 119.0499; 115.0033	Coumaroylmalic acid I	Fabaceae (Pisum sativum)	12
40	18.07	366.095	365.089	C17H18O9	95.41	-1.95	244; 288; 333	N	203.0349; 159.0452; 131.0500; 130.0422; 103.0551		Moraceae (Ficus carica)	9
41	18.33	340.079	339.073	C15H16O9	98.09	-2.02	230; 286; 332	N	309.0621; 223.0610; 208.0375; 193.0137; 164.0478; 149.0242; 133.0143; 115.0038	Sinapic acid malate	Brassicaceae (Arabidopsis thaliana)	13
42	18.37	280.058	279.051	C13H12O7	99.07	1.06	296; 324	N	163.0401; 133.0139; 119.0500; 115.0033	Coumaroylmalic acid II	Fabaceae (Pisum sativum)	12
43	18.51	310.069	309.062	C14H14O8	99.61	-0.78	298; 325	N	193.0505; 178.02687; 149.0602; 133.0144; 115.0033	Ferulic acid malate I	Solanaceae (Solanum tuberosum)	14
44	18.68	310.069	309.062	C14H14O8	98	-2.03	288; 320	N	193.0502; 134.0371	Ferulic acid malate II	Solanaceae (Solanum tuberosum)	14
45	19.06	194.058	193.051	C10H10O4	77.56	1.56	284; 326	N	134.037	Trans-ferulic acidg	Moraceae (Ficus carica)	8
46	19.63	194.058	193.051	C10H10O4	97.3	0.02	282; 325	N	134.038	Ferulic acid isomer	Moraceae (Ficus carica)	8
Flavonoids-Flavonols
47	13.15	772.206	771.201	C33H40O21	95.06	-2.51	354	N/P	609.1470; 463.0889; 462.0810; 301.0359; 300.0281	Quercetin O-deoxyhexoside di-hexoside	Several familiesb
48	13.3	626.148	625.142	C27H30O17	98.9	-0.81	348	N/P	463.0894; 462.0805, 301.0359	Quercetin O-di-hexoside	Several familiesb
49	15.53	756.211	755.205	C33H40O20	93.21	-1.08	356	N/P	301.0359; 300.027	Quercetin di-deoxyhexoside hexoside	Several familiesb
50	17.14	610.153	609.148	C27H30O16	93.07	-3.4	356	N/P	463.0882; 300.0282; 273.0397; 257.0451; 229.0502; 178.9984; 151.0032; 121.0296; 107.0140	Quercetin-3-O-rutinosideg (rutin)	Moraceae (Ficus carica)	7–9,15
51	17.89	464.096	463.088	C21H20O12	99.51	-0.28	354	N/P	301.0349; 300.0272; 151.0034	Quercetin-3-O-glucosideg (isoquercetin)	Moraceae (Ficus carica)	8–10,15
52	18.57	550.096	549.089	C24H22O15	98.98	-1.18	354	N/P	505.0987; 463.0874; 301.0354; 300.0279	Quercetin 3-O-(6"-malonyl)glucoside	Moraceae (Ficus carica)	9
53	23.05	302.043	301.037	C15H10O7	83.2	-0.82	371	N/P	273.0409; 178.9990; 151.0035; 121.0295; 107.0139	Querceting	Moraceae (Ficus carica)	11,16
Flavonoids-Flavones
54	14.61	580.143	579.136	C26H28O15	97.74	-0.99	342	N/P	561.1247; 519.1140; 489.1039; 459.0930; 429.0827; 399.0721; 369.0616; 285.0389; 133.0289	Luteolin C-hexoside C-pentoside I	Moraceae (Ficus carica)	15
55	14.77	580.143	579.136	C26H28O15	96.56	-1.01	346	N/P	561.1251; 519.1139; 489.1045; 459.0942; 429.0833; 399.0733; 369.0619; 285.0389; 133.0297	Luteolin C-hexoside C-pentoside II	Moraceae (Ficus carica)	15
56	14.98	564.148	563.141	C26H28O14	97.63	-1.06	334	N/P	545.1302; 503.1196; 473.1089; 443.0984; 383.0770; 353.0668; 325.0707; 297.0753; 117.0347	Apigenin C-hexoside C-pentoside Ic	Moraceae (Ficus carica)	9
57	15.48	564.148	563.143	C26H28O14	92.17	-2.16	336	N/P	545.1307; 503.1199; 473.1098; 443.0980; 383.0780; 353.0673; 325.0715; 297.0769; 117.0344	Apigenin C-hexoside C-pentoside IIc	Moraceae (Ficus carica)	9
58	15.97	448.101	447.094	C21H20O11	96.97	-1.6	350	N/P	429.0833; 387.0722; 357.0615; 327.0513; 285.0404; 133.0138	Luteolin 6-C-glucoside (isoorientin)d	Arecaceae (Elaeis guineensis)	17
59	16.15	564.148	563.142	C26H28O14	92.32	-2.16	330	N/P	545.1303; 503.1186; 473.1098; 443.0982; 383.0776; 353.0670; 297.0767; 117.0357	Apigenin 6-C-hexose-8-C-pentose IIIc	Moraceae (Ficus carica)	9
60	16.52	448.101	447.094	C21H20O11	99.31	-0.23	348	N/P	357.0613; 327.0510; 285.0397; 133.0291	Luteolin 8-C-glucoside (orientin)d	Moraceae(Ficus carica); Arecaceae (Elaeis guineensis)	10,17
61	16.83	578.164	577.156	C27H30O14	97.57	0.03	330	N/P	457.1393; 413.0873; 293.0454	Apigenin C-hexoside C-deoxyhexoside	Arecaceae (Elaeis guineensis)	17
62	17.45	432.106	431.099	C21H20O10	97.72	-1.76	324	N/P	341.0664; 311.0561; 283.0612; 269.04524; 268.0372; 117.0342	Apigenin 8-C-glucoside (vitexin)	Moraceae (Ficus deltoidea)	18
63	17.89	448.101	447.095	C21H20O11	89.92	-0.99	352	N/P	285.0406; 284.0334; 197.0817; 175.0250; 133.0277	Luteolin-7-O-glucosideg (cynaroside)	Several familiesb
64	22.46	286.048	285.041	C15H10O6	83.77	-2.12	346	N/P	267.0306; 257.0470; 243.0301; 241.0516; 217.0511; 213.0562; 197.0618; 175.0400; 151.0038; 133.0294	Luteoling	Moraceae (Ficus carica)	3
65	24.27	270.053	269.046	C15H10O5	99.33	-1.21	336	N/P	241.0492; 227.0351; 225.0539; 201.0556; 183. 0441; 181.0650; 159.0455; 151.0035; 149.0245; 117.0348; 107.0139	Apigening	Moraceae (Ficus formosana; Ficus hirta; Ficus tsiangii)	19,20
Flavonoids-Flavanones
66	16.13	612.169	611.163	C27H32O16	89.16	-2.43	280	N	449.1090; 287.0571; 151.0037; 135.0445	Eriodictyol di-hexoside	Several familiesb
67	17.95	450.116	449.109	C21H22O11	95.87	-1.27	280	N	287.0556; 151.0036; 135.0450; 107.0142	Eriodictyol hexoside I	Several familiesb
68	19.93	450.116	449.109	C21H22O11	98.69	-1.02	286	N	287.0553; 151.0032; 135.0450; 107.0138	Eriodictyol hexoside II	Several familiesb
69	22.85	288.063	287.056	C15H12O6	99.63	-0.99	284	N	151.0030; 135.0448; 125.0241; 107.0136; 83.0135	Eriodictyol	Moraceae (Ficus tsiangii; Ficus sarmentosa)	20,21
70	24.58	272.068	271.061	C15H12O5	99.22	-0.12	289	N	177.0194; 151.0030; 119.0503; 107.0138	Naringenin	Moraceae (Ficus tsiangii)	20
Flavonoids-Flavanols
71	14.61	290.079	289.072	C15H14O6	99.31	-0.7	276	N	245.0797; 205.0512; 203.0709; 161.0615; 125.0238	(+)-cateching	Moraceae (Ficus carica)	10,15,22
Flavonoid-Flavanonols
72	19.5	304.058	303.051	C15H12O7	97.47	-0.03	284	N	285.0385; 151.0033; 125.0243	Dihydroquercetin (taxifolin)	Moraceae (Ficus sarmentosa; Ficus tsiangii)	20,21
Flavonoid-Isoflavones
73	22.71	548.117	547.109	C25H24O14	98.7	-0.73	N.D.	N/P	503.1264; 299.0564; 284.0364; 165.0191; 149.9951; 133.0293; 121.0295	Hydroxygenistein methyl ether malonylhexoside
74	24.38	270.053	269.046	C15H10O5	98.34	-1.2	260; 330	N/P	241.0468; 225.0558; 201.0558; 151.0041; 133.0284; 119.0504; 117.0343; 107.0137	Genisteing	Moraceae (Ficus cordata; Ficus nymphaeifolia; Ficus tsiangii)	19,20,23,24
75	25.8	300.063	299.056	C16H12O6	96.59	-1.33	260; 336	N/P	298.0475; 285.0356; 284.0315; 256.0375; 240.0420; 239.0336; 165.0188; 149.9955; 133.0289; 121.0287	7-methoxy 2'-hydroxy genistein (cajanin)	Moraceae (Ficus nymphaeifolia)	23
76	26.51	354.11	353.104	C20H18O6	97.16	-2.26	266	N/P	325.1074; 298.0472; 283.0604; 219.0655; 175.0397; 133.0658; 133.0290	Prenylhydroxygenistein I	Fabaceaee
77	27.186	354.11	353.103	C20H18O6	84.2	-2.18	262	N/P	325.1077; 285.1134; 284.0338; 219.0656; 175.0402; 151.0766; 133.0655; 133.0291	Prenylhydroxygenistein II	Fabaceaee
78	27.61	338.115	337.108	C20H18O5	94.8	-2.69	N.D.	N/P	293.0462; 282.0534; 269.1190; 254.0516; 133.0658; 117.0346	Prenylgenistein I	Moraceae (Ficus tikoua; Ficus mucuso)f	24
79	27.623	354.11	353.103	C20H18O6	99.65	-0.39	264; 344	N/P	325.1080; 285.1134; 284.0329; 219.0663; 175.0395; 151.0760; 151.0032; 133.0658; 133.0294	Prenylhydroxygenistein III	Fabaceaee
80	27.8	284.068	283.062	C16H12O5	98.13	-1.75	N.D.	N/P	268.0377; 239.0351; 151.0040; 132.0194; 107.0134	Genistein 4'-methyl ether (biochanin A)	Moraceae (Ficus nymphaeifolia)	23
81	28.64	338.115	337.109	C20H18O5	98.84	-1.54	264; 338	N/P	293.0456; 282.0537; 269.0436; 268.0296; 254.0589; 238.0633; 225.0549; 133.0289	Prenylgenistein II	Moraceae (Ficus tikoua; Ficus mucuso)f	24
82	29.1	338.115	337.108	C20H18O5	99	-0.33	266; 340	N/P	293.0455; 282.0533; 269.0444; 268.0370; 253.0501; 254.0574; 238,0634; 133.0292	Prenylgenistein III	Moraceae (Ficus tikoua; Ficus mucuso)f	24
Hydroxycoumarins
83	13.11	340.079	339.073	C15H16O9	98.01	-1.94	276; 330	N	177.0192; 133.0295	Esculetin hexoside I	Moraceae (Ficus septica)	19,25
84	13.8	340.079	339.072	C15H16O9	96.64	-1.1	274; 336	N	177.019	Esculetin hexoside II	Moraceae (Ficus septica)	19,25
85	15.69	178.027	177.019	C9H6O4	98.38	1.13	N.D.	N	149.0240; 133.0240; 105.0343	Dihydroxycoumarin I	Moraceae (Ficus tsiangii)	20
86	18.26	206.022	205.014	C10H6O5	91.65	0.07	286	N	161.0240; 133.0294; 117.0342; 105.0346; 89.0399; 77.0398	6-carboxyl-umbelliferone	Moraceae (Ficus tsiangii)	20
87	19.25	162.032	161.025	C9H6O3	87.05	-1.68	284; 316	N	133.0292; 117.0348; 105.0347	7-Hydroxycoumaring (umbelliferone)	Moraceae (Ficus carica)	19,27
88	20.81	178.027	177.019	C9H6O4	87.39	-0.27	286	N	149.0219; 133.0287; 105.0349	Dihydroxycoumarin II	Moraceae (Ficus tsiangii)	20
89	22.54	206.058	205.051	C11H10O4	99.57	0.07	244; 254sh; 286; 336	N	187.0375; 161.0609; 146.0370; 133.0654; 118.0418; 105.0707	Phellodenol A/hydrated form of 4',5'-dihydropsoralen	Moraceae (Fatoua pilosa)	28
90	23.03	236.069	235.062	C12H12O5	96.78	-2.78	252; 286	N	217.0493; 201.0195; 191.0706; 176.0474; 161.0240; 148.0148; 133.0293; 117.0343	Murrayacarpin B/di-hydrated form of bergapten
91	27.95	230.094	229.087	C14H14O3	99.41	-0.72	N.D.	N/P	213.0551; 185.1162; 146.0371; 130.0424; 118.0426	Prenyl-7-hydroxycoumarin	Several familiesb
aI, Ionisation mode; M, monoisotopic neutral mass; RT, retention time
bSeveral saccharide combinations and conjugation posititons are reported in different plant families (see KNApSAck, Reaxys or SciFinder databases), although these compounds were not described in Moraceae.
cApigenin C-hexoside C-pentoside could be schaftoside (apigenin 6-C-glucoside 8-C-arabinoside) or isochaftoside (apigenin 6-C-arabinoside 8-C-glucoside). The latter were previously described in Ficus carica leaves.9
dThe identification was based on the elution pattern under similar analytical conditions.17
eAlthough these compounds were not described in family Moraceae, they are common in the family Fabaceae (see KNApSAck, Reaxys or SciFinder databases)
f6-, 8- and 3'-prenylgenistein were previously reported in other Ficus species.
gIdentification confirmed by comparison with standards.
Reference
1. I. M. Abu-Reidah, M. d. M. Contreras, D. Arráez-Román, A. Segura-Carretero, and A. Fernández-Gutiérrez, Journal of Chromatography A, 2013, 1313, 212–227.
2. Y. Zhao, X. Li, X. Zeng, S. Huang, S. Hou, and X. Lai, Analytical Methods, 2014, 6, 1359-1363.
3. H. Lazreg Aref, B. Gaaliche, A. Fekih, M. Mars, M. Aouni, J. Pierre Chaumon, and K. Said, Natural product research, 2011, 25, 310–319.
4. M. Gómez-Romero, A. Segura-Carretero, and A. Fernández-Gutiérrez, Phytochemistry, 2010, 71, 1848–1864.
5. T. Beelders, D. de Beer, M. A. Stander, and E. Joubert, Molecules (Basel, Switzerland), 2014, 19, 11760–11790.
6. I. M. Abu-Reidah, D. Arraez-Roman, A. Segura-Carretero, and A. Fernandez-Gutierrez, Food Chemistry, 2013, 141, 2269–2277.
7. D. M. Teixeira, R. F. Patão, A. V. Coelho, and C. T. Da Costa, Journal of Chromatography A, 2006, 1103, 22–28.
8. A. P. Oliveira, P. Valentão, J. A. Pereira, B. M. Silva, F. Tavares, and P. B. Andrade, Food and Chemical Toxicology, 2009, 47, 2841–2846.
9. T. Takahashi, A. Okiura, K. Saito, and M. Kohno, Journal of Agricultural and Food Chemistry, 2014, 62, 10076–10083.
10. A. Slatnar, U. Klancar, F. Stampar, and R. Veberic, Journal of Agricultural and Food Chemistry, 2011, 59, 11696–11702.
11. G. Pande and C. C. Akoh, Food Chemistry, 2010, 120, 1067–1075.
12. M. Dueñas, I. Estrella, and T. Hernández, European Food Research and Technology, 2004, 219, 116–123.
13. F. Stehle, W. Brandt, J. Schmidt, C. Milkowski, and D. Strack, Phytochemistry, 2008, 69, 1826–31.
14. C. E. Narváez-Cuenca, J. P. Vincken, and H. Gruppen, Food Chemistry, 2012, 130, 730–738.
15. F. Vallejo, J. G. Marín, and F. A. Tomás-Barberán, Food Chemistry, 2012, 130, 485–492.
16. E. Faleh, A. P. Oliveira, P. Valentão, A. Ferchichi, B. M. Silva, and P. B. Andrade, Revista Brasileira de Farmacognosia, 2012, 22, 1282–1289.
17. N. Tahir, K. Shaari, and F. Abas, Journal of Agricultural and Food Chemistry, 2012, 60, 11201–11210.
18. C. Y. Choo, N. Y. Sulong, F. Man, and T. W. Wong, Journal of ethnopharmacology, 2012, 142, 776–81.
19. E. P. Lansky, H. M. Paavilainen, A. D. Pawlus, and R. A. Newman, Journal of Ethnopharmacology, 2008, 119, 195–213.
20. Y. Wang, H. Liang, Q. Zhang, W. Cheng, and S. Yi, Biochemical Systematics and Ecology, 2014, 57, 210–215.
21. X.-G. Wang, X.-Y. Wei, Y.-Q. Tian, L.-T. Shen, and H.-H. Xu, Agricultural Sciences in China, 2010, 9, 690–694.
22. R. Veberic, M. Colaric, and F. Stampar, Food Chemistry, 2008, 106, 153–157.
23. N. Darbour, C. Bayet, S. Rodin-Bercion, Z. Elkhomsi, F. Lurel, A. Chaboud, and D. Guilet, Natural Product Research, 2007, 21, 461–464.
24. S. Wei, W. Wu, and Z. Ji, International Journal of Molecular Sciences, 2012, 13, 7375–7382.
25. P. L. Wu, K. V. Rao, C. H. Su, C. S. Kuoh, and T. S. Wu, Heterocycles, 2002, 57, 2401–2408.
26. V. Kuete, B. Ngameni, C. C. F. Simo, R. K. Tankeu, B. T. Ngadjui, J. J. M. Meyer, N. Lall, and J. R. Kuiate, Journal of Ethnopharmacology, 2008, 120, 17–24.
27. G. Innocenti, A. Bettero, and G. Caporale, Il Farmaco; edizione scientifica, 1982, 37, 475–485.
28. C. Chiang, M. Cheng, C. Peng, H. Huang, and I. Chen, Chemistry & biodiversity, 2010, 7, 1728–1736.
