# Supplementary material for: Assessment of the distribution of phenolic compounds and contribution to the antioxidant activity in Tunisian fig leaves, fruits, skins and pulps using mass spectrometry-based analysis
Source: Royal Society of Chemistry journal article supplement (doi:10.1039/c5fo00837a), 2015-01-01
Supplement: c5fo00837a2.xlsx [file c5fo00837a2.xlsx]

## Sheet: Positive
Table S2. Phenolic compounds characterized using the positive ionization mode in the studied parts from F. carica.
	RTa (min)	[M]+/ [M+H]+	M	Formula	Score	Error (ppm)	UV (nm)	Ia	Main fragments via MS/MS	Proposed compound	Plant family	Reference
Anthocyanins
1	9.03	595.166	594.159	C27H31O15	98.98	-0.98	284; 520	P	449.1079; 287.0559; 269.0420; 213.0547; 157.0268; 137.0242; 121.0277	Cyanidin rutinoside I	Moraceae (Ficus carica)	1,2
2	10.21	757.219	756.211	C33H41O20	98.43	-0.68	520	P	611.1585; 449.1063; 287.0563; 269.0447; 137.0230	Cyanidin 3-rutinoside-hexose	Malvaceae (Hibiscus mutabilis)	3,4
3	10.39	595.169	594.159	C27H31O15	98.91	-0.95	520	P	449.1073; 287.0558; 269.0447; 213.0527; 137.0235	Cyanidin rutinoside II	Moraceae (Ficus carica)	1,2
4	11.63	611.162	610.153	C27H31O16	97.54	-1.82	280; 518	P	449.1078; 287.0565; 269.0438; 213.0546; 157.0656; 137.0226; 121.0291	Cyanidin 3,5-diglucoside	Moraceae (Ficus carica)	1,2
5	13	697.161	696.154	C30H33O19	96.33	-1	520	P	N.D.	Cyanidin 3-malonylglucosyl-5-glucoside	Moraceae (Ficus carica)	1,2
6	13.06	449.107	448.101	C21H21O11	97.33	1.75	280; 520	P	287.0537; 269.0386; 241.0500; 213.0526; 157.0651; 137.0213; 121.0242	Cyanidin 3-glucoside	Moraceae (Ficus carica)	1,2,5
7	13.31	595.166	594.159	C27H31O15	99.52	-0.32	284; 520	P	449.1073; 287.0547; 269.0463; 213.0545; 157.0638; 137.0229; 121.0282	Cyanidin rutinoside III	Moraceae (Ficus carica)	1,2,5
8	13.86	911.224	910.217	C43H43O22	98.22	-0.57	520	P	603.1127; 571.0875; 477.0812; 435.0709; 287.0555; 157.0277; 137.0223; 121.0247	Dimer of cyanidin rutinoside and petunidin
9	13.99	579.169	578.168	C27H31O14	96.96	-1.73	280; 520	P	433.1084; 271.0544; 253.0525; 197.0595; 149.0227; 121.0277; 103.0539	Pelargonidin 3-rutinoside	Moraceae (Ficus carica)	1,2
Furanocoumarins
10	15.85	365.087	364.079	C17H16O9	98.23	-1.5	250; 264; 308	P	203.0339; 175.0384; 147.0439; 131.0489; 119.0488; 101.0390; 91.0541	Hydroxypsoralen hexoside Ib	Umbelliferae (Glehniae Radix)	6
11	16.71	365.087	364.097	C17H16O9	96.86	-1.02	252; 264; 314	P	203.0336; 175.0389; 147.0440; 131.0395; 119.0485; 91.0539	Hydroxypsoralen hexoside IIb	Umbelliferae (Glehniae Radix)	6
12	17.21	205.051	204.042	C11H8O4	88.15	-3.52	255; 290; 335	N/P	187.0370; 133.0637; 131.0489; 115.0537; 107.0492; 105.0693; 103.0539	Psoralic acid/dihydro-hydroxypsoralen
13	17.59	247.097	246.089	C14H14O4	97.18	-2.78	254; 310	P	229.0852; 213.0539; 189.0543; 175.0389; 147.0438; 119.0486; 103.0536	Marmesin isomer Ic	Moraceae (Ficus carica)	7,8
14	17.64	409.15	408.142	C20H24O9	96.18	-0.98	N.D.	N/P	247.0962; 229.0862; 213.0545; 185.0602; 175.0389; 147.0348; 119.0487; 91.0543	Marmesinin	Umbelliferae (Glehniae Radix)	6
15	17.77	235.061	234.053	C12H10O5	90.65	-4.13	254; 303	P	217.0495; 202.0260; 189.0565; 174.0309; 131.0489; 115.0542	Methoxypsoralen derivative (hydrate)
16	21.61	189.055	188.047	C11H8O3	84.59	-1.27	250; 290	N/P	161.0608; 147.0439; 133.0638; 119.0489; 105.0699	4',5'-Dihydropsoralen	Moraceae (Ficus carica)	8
17	22.05	247.097	246.089	C14H14O4	97.7	-2.86	254	P	229.0865; 213.0531; 189.0576; 175.0385; 147.0443; 119.0481; 103.0539	Marmesin isomer IIc	Moraceae (Ficus carica)	7,8
18	22.23	305.103	304.095	C16H16O6	94.31	-3.7	256; 266; 310	N/P	203.0338; 175.0391; 159.0439; 147.0438; 131.0489; 119.0486; 91.0543	Oxypeucedanin hydrate	Moraceae (Ficus pumila)	13
19	22.46	203.034	202.027	C11H6O4	86.21	0.34	254; 270; 308	N/P	147.0438; 131.0493; 129,0308; 119.0485; 101,0388; 91.0541	Hydroxypsoralend	Umbelliferae (Radix glehniae)	6
20	24.54	187.039	186.032	C11H6O3	98.94	0.24	254; 298; 330	P	159.0435; 131.0487; 115.0536; 103.0537	Psoralen	Moraceae (Ficus carica)	9–12
21	26.08	217.051	216.042	C12H8O4	94.54	-4.8	254; 268; 312	P	202.0264; 174.0316; 146.0363; 131.0498; 118.0416; 90.0464; 89.0391	Methoxypsoralen	Moraceae (Ficus carica)	9–13
22	26.2	287.092	286.084	C16H14O5	99.44	-1.23	254; 268; 306	P	203.0339; 175.0394; 159.0442; 147.0440; 131.0494; 119.0492; 103.0539	Oxypeucedanin	Umbelliferae (Radix glehniae)	6
23	28.24	271.098	270.089	C16H14O4	86.44	-5.58	N.D.	P	229.0506; 215.0348; 203.0350; 201.0554, 187.0399; 173.0604; 159.0447; 131.0495; 117.0702	Isopentenoxypsoralen	Moraceae and other familiese
24	31	285.113	284.105	C17H16O4	96.36	-3.31	268; 310	P	202.0257; 174.0317; 159.0440; 146.0359; 131.0490; 118.0413	Prenyl methoxypsoralen	Moraceae (Dorstenia spp.)	14
Otherse
25	30.853	299.091	298.084	C17H14O5	96.47	2.86	262; 329	P	284.0691; 267.0664; 256.0742; 243.1029; 166.0271; 137.0603	Hydroxy-dimethoxyisoflavone	Fabaceaef
aI, Ionisation mode; M, monoisotopic neutral mass; RT, retention time
bHydroxypsoralen hexoside could be 5-hydroxypsoralen hexoside (bergaptol hexoside) or 8-hydroxypsoralen hexoside (xanthoxol hexoside)
cMarmesin was previously described in Ficus carica8 and its enantiomeric form nodakenetin in Ficus tsiangii7
dHydroxypsoralen could be 5-hydroxypsoralen (bergaptol) or 8-hydroxypsoralen (xanthoxol) according to Yang et al. (2010)6
eCompounds widely reported in other Moraceae species and plant families (see KNApSAck, Reaxys or SciFinder databases)
fAlthough these compounds were not described in the family Moraceae, they are common in the family Fabaceae (see KNApSAck, Reaxys or SciFinder databases)
Referance
1. M. Dueñas, J. J. Pérez-Alonso, C. Santos-Buelga, and T. Escribano-Bailón, Journal of Food Composition and Analysis, 2008, 21, 107–115.
2. M. I. Barolo, N. Ruiz Mostacero, and S. N. López, Food Chemistry, 2014, 164, 119–127.
3. J. B. Harborne, Phytochemistry, 1963, 2, 85–97.
4. B. S. Luh, K. Stachowicz, and C. L. Hsia, Journal of Food Science, 1965, 30, 300–306.
5. A. Solomon, S. Golubowicz, Z. Yablowicz, S. Grossman, M. Bergman, H. E. Gottlieb, A. Altman, Z. Kerem, and M. A. Flaishman, Journal of Agricultural and Food Chemistry, 2006, 54, 7717–7723.
6. W. Yang, M. Ye, M. Liu, D. Kong, R. Shi, X. Shi, K. Zhang, Q. Wang, and Z. Lantong, Journal of Chromatography A, 2010, 1217, 4587–4600.
7.Y. Wang, H. Liang, Q. Zhang, W. Cheng, and S. Yi, Biochemical Systematics and Ecology, 2014, 57, 210–215.
8. G. Innocenti, A. Bettero, and G. Caporale, Il Farmaco; edizione scientifica, 1982, 37, 475–485.
9. D. M. Teixeira, R. F. Patão, A. V. Coelho, and C. T. Da Costa, Journal of Chromatography A, 2006, 1103, 22–28.
10. A. P. Oliveira, P. Valentão, J. A. Pereira, B. M. Silva, F. Tavares, and P. B. Andrade, Food and Chemical Toxicology, 2009, 47, 2841–2846.
11. M. Marrelli, F. Menichini, G. A. Statti, M. Bonesi, P. Duez, F. Menichini, and F. Conforti, Food and Chemical Toxicology, 2012, 50, 726–733.
12. T. Takahashi, A. Okiura, K. Saito, and M. Kohno, Journal of Agricultural and Food Chemistry, 2014, 62, 10076–10083.
13. E. A. Juan, J. A. Rideout, and C. Y. Ragasa, Philippine Journal of Science (Philippines), 1997.
14. R. Heinke, K. Franke, K. Michels, L. Wessjohann, N. A. A. Ali, and J. Schmidt, Journal of Mass Spectrometry, 2012, 47, 7–22.
